# Supplementary material for: A simple approach for the discrimination of surfactants based on the control of squaraine aggregation
Source: Royal Society of Chemistry journal article supplement (doi:10.1039/c5cc06086a), 2015-01-01
Supplement: c5cc06086a1.pdf [file c5cc06086a1.pdf]

## Supplementary information for

# A simple approach for the discrimination of surfactants based on the control of squaraines aggregation

Benhao Li,<sup>a,b</sup> Weiwei Li,<sup>a,c</sup> Yongqian Xu,<sup>\*a</sup> Jiang Li,<sup>b,d</sup> Jia Tu<sup>a</sup> and Shiguo Sun<sup>a</sup>

<sup>a</sup> College of Science, Northwest A&F University, Yangling, Shaanxi, P.R. China, 712100,  
[xuyq@nwsuaf.edu.cn](mailto:xuyq@nwsuaf.edu.cn)

<sup>b</sup> School of Chemistry & Chemical Engineering, Shaanxi Normal University, Xi'an, P. R. China,  
710062

<sup>c</sup> Xinjiang University, Urumqi, Xinjiang, P.R. China, 830046

<sup>d</sup> School of Basic Medical Science, Ningxia Medical University, Yinchuan, P. R. China, 750004

## Experimental Section

### Materials

Sodium dodecyl sulfate (SDS), sodium dodecyl benzene sulfonate (SDBS), dodecyl sodium carbonate (SDC), sodium monododecyl phosphate (SDP), hexadecyl trimethyl ammonium bromide (CTAB), Triton X-100 reagents were purchased from Aladdin (China). Other chemicals and solvents were used as received if not noted. Probe squaraine (SQ) dye, was synthesized and purified as reported previously.<sup>S1</sup>

### Measurements

Fluorescence and absorption spectra were collected by using a RF-5301 fluorescence spectrometer (Japan) and a Shimadzu 1750 UV-visible spectrometer, respectively. X-ray power diffraction (XRD) spectra were obtained by using Rigaku miniflex 600.

### Sample Preparation, Data Acquisition and Analysis

All measurements were performed at 25 °C. Stock solution of SQ ( $5.0 \times 10^{-4}$  M) was prepared in ethanol and diluted in distilled water (pH 7.0) to  $5.0 \times 10^{-6}$  M for titration experiments. Stock solutions of Sodium dodecyl sulfate (SDS), sodium dodecyl benzene sulfonate (SDBS), dodecyl sodium carbonate (SDC), sodium monododecyl phosphate (SDP), hexadecyl trimethyl ammonium bromide (CTAB), Triton X-100 were prepared in distilled water and diluted in distilled water (pH 7.0) for titration

experiments. UV and emission spectra were monitored within 20 seconds. There were three measurements at each concentration for one sample. Urine was collected from different adult volunteers and filtrated with 0.4  $\mu\text{M}$  filter membrane. The filtrates were diluted 5 times with distilled water for use.

All data for LDA were collected from absorption spectra of **SQ**/surfactants. In water solution, each of surfactant was selected three different concentrations including 3.33  $\mu\text{M}$ , 33.33  $\mu\text{M}$  and 400  $\mu\text{M}$ . The absorbance at 470, 488, 518, 528, 548, 568, 588, 598, 624 and 700nm were submitted to perform variable as the following formula: variable 1=  $(A_{470}-A_{700}) / A_{568}$ , variable 2=  $(A_{488}-A_{700}) / A_{568}$ , variable 3=  $(A_{518}-A_{700}) / A_{568}$ , variable 4=  $(A_{528}-A_{700}) / A_{568}$ , variable 5=  $(A_{548}-A_{700}) / A_{568}$ , variable 6=  $(A_{588}-A_{700}) / A_{568}$ , variable 7=  $(A_{598}-A_{700}) / A_{568}$ , variable 8=  $(A_{624}-A_{700}) / A_{568}$ . In urine sample, each of surfactant was selected three different concentrations including 53.33, 234.00, 400.00  $\mu\text{M}$ . The absorbance at 446, 466, 470, 486, 522nm, 567nm, 590nm, 626nm, 645nm, 700 nm were submitted to perform variable as the following formula:

$$\text{VAR1} = (A_{446}-A_{700}) / A_{522},$$

$$\text{VAR2} = (A_{466}-A_{700}) / A_{522},$$

$$\text{VAR3} = (A_{470}-A_{700}) / A_{522},$$

$$\text{VAR4} = (A_{486}-A_{700}) / A_{522},$$

$$\text{VAR5} = (A_{567}-A_{700}) / A_{522},$$

$$\text{VAR6} = (A_{590}-A_{700}) / A_{522},$$

$$\text{VAR7} = (A_{626}-A_{700}) / A_{522},$$

$$\text{VAR8} = (A_{645}-A_{700}) / A_{522},$$

The input is:

USE HAO1

LABEL SPECIES / 1="SDS", 2="SDBS", 3="SDC", 4="SDP", 5="CTAB", 6="Triton X-100"

DISCRIM

MODEL SPECIES = VAR1..VAR8

PLENGTH / MEANS CLASS JCLASS

ESTIMATE

In the process of data analysis, LDA was used and Jackknifed classification matrices were taken to evaluate discrimination results. The main results are listed as follow:

**Table. S1** All average values of eight variables for six surfactants in water.

| variable | SDS   | SDBS  | SDC   | SDP   | CTAB   | Triton X-100 |
|----------|-------|-------|-------|-------|--------|--------------|
| 1        | 4.114 | 2.027 | 0.06  | 0.384 | -0.005 | -0.004       |
| 2        | 1.171 | 1.355 | 0.167 | 0.6   | 0.038  | 0.058        |
| 3        | 0.503 | 0.736 | 0.636 | 0.61  | 0.398  | 0.38         |
| 4        | 1.321 | 1.142 | 1.1   | 1.135 | 1.045  | 0.795        |
| 5        | 0.711 | 0.786 | 0.84  | 0.806 | 0.784  | 0.744        |
| 6        | 1.135 | 0.882 | 0.647 | 0.641 | 0.445  | 0.514        |
| 7        | 1.026 | 0.74  | 0.6   | 0.565 | 0.374  | 0.454        |
| 8        | 1.437 | 0.648 | 0.763 | 0.623 | 0.57   | 0.699        |

**Table. S2** Summary of the Jackknifed Classification Matrix for six surfactants in water.

|              | SDS | SDBS | SDC | SDP | CTAB | Triton X-100 | correct% |
|--------------|-----|------|-----|-----|------|--------------|----------|
| SDS          | 9   | 0    | 0   | 0   | 0    | 0            | 100      |
| SDBS         | 0   | 9    | 0   | 0   | 0    | 0            | 100      |
| SDC          | 0   | 0    | 9   | 0   | 0    | 0            | 100      |
| SDP          | 0   | 0    | 0   | 9   | 0    | 0            | 100      |
| CTAB         | 0   | 0    | 0   | 0   | 9    | 0            | 100      |
| Triton X-100 | 0   | 0    | 0   | 0   | 0    | 9            | 100      |
| Total        | 9   | 9    | 9   | 9   | 9    | 9            | 100      |

**Table. S3** Group Frequencies

| SDS | SDBS | SDC | SDP | CTAB | Triton X-100 |
|-----|------|-----|-----|------|--------------|
| 9   | 9    | 9   | 9   | 9    | 9            |

**Table. S4** All average values of eight variables for six surfactants in urine.

|      | SDS    | SDBS  | SDC   | SDP   | CTAB  | Triton X-100 |
|------|--------|-------|-------|-------|-------|--------------|
| VAR1 | -0.493 | 0.016 | 0.312 | 0.325 | 0.462 | -0.049       |
| VAR2 | 2.536  | 2.050 | 0.386 | 0.408 | 0.497 | 0.114        |
| VAR3 | 3.340  | 2.633 | 0.404 | 0.458 | 0.505 | 0.142        |
| VAR4 | 2.391  | 2.341 | 0.426 | 0.456 | 0.493 | 0.193        |
| VAR5 | 0.317  | 0.749 | 0.971 | 0.916 | 0.906 | 0.965        |
| VAR6 | 2.049  | 0.429 | 0.229 | 0.303 | 0.875 | 0.177        |
| VAR7 | 3.574  | 0.347 | 0.149 | 0.187 | 1.220 | 0.212        |
| VAR8 | 5.953  | 0.678 | 0.108 | 0.167 | 0.630 | 0.235        |

**Table. S5** Summary of the Jackknifed Classification Matrix for six surfactants in urine.

|              | SDS | SDBS | SDC | SDP | CTAB | Triton X-100 | correct% |
|--------------|-----|------|-----|-----|------|--------------|----------|
| SDS          | 9   | 0    | 0   | 0   | 0    | 0            | 100      |
| SDBS         | 0   | 9    | 0   | 0   | 0    | 0            | 100      |
| SDC          | 0   | 0    | 9   | 0   | 0    | 0            | 100      |
| SDP          | 0   | 0    | 0   | 9   | 0    | 0            | 100      |
| CTAB         | 0   | 0    | 0   | 0   | 9    | 0            | 100      |
| Triton X-100 | 0   | 0    | 0   | 0   | 0    | 9            | 100      |
| Total        | 9   | 9    | 9   | 9   | 9    | 9            | 100      |

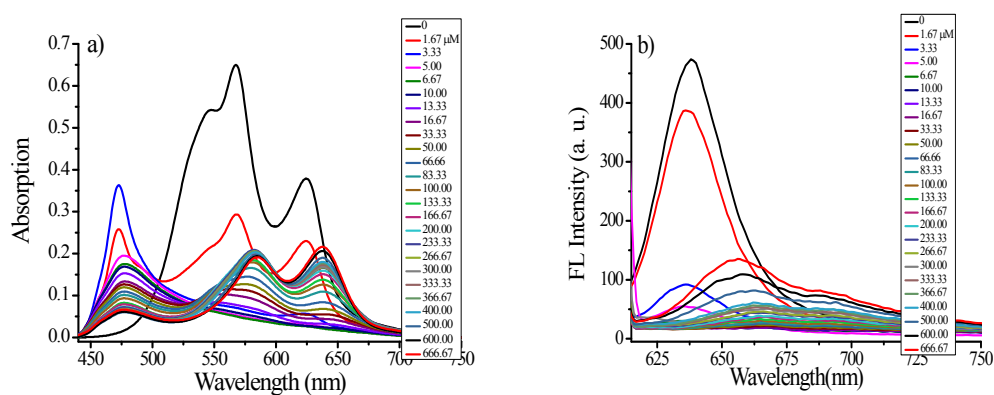

**Fig. S1** UV-Vis (a) and fluorescence (b) spectra of probe SQ (5 μM) upon addition of SDBS in distilled water (pH 7.0). ( $\lambda_{\text{ex}} = 600 \text{ nm}$ )

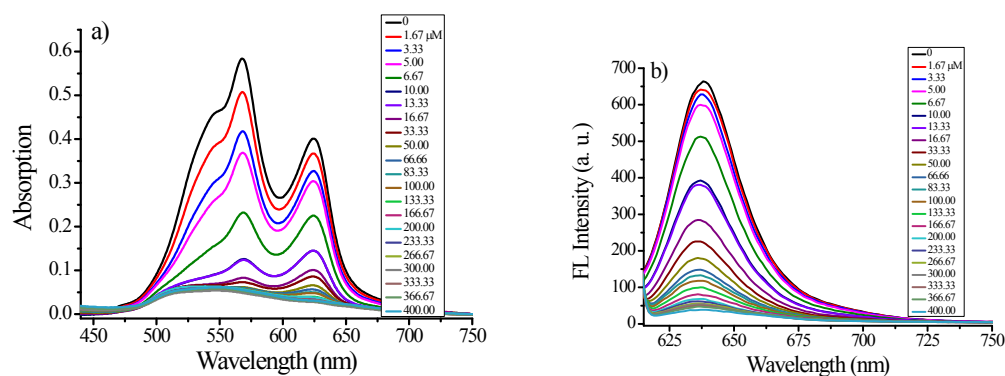

**Fig. S2** UV-Vis (a) and fluorescence (b) spectra of probe SQ (5 μM) upon addition of SDC in distilled water (pH 7.0). ( $\lambda_{\text{ex}} = 600 \text{ nm}$ )

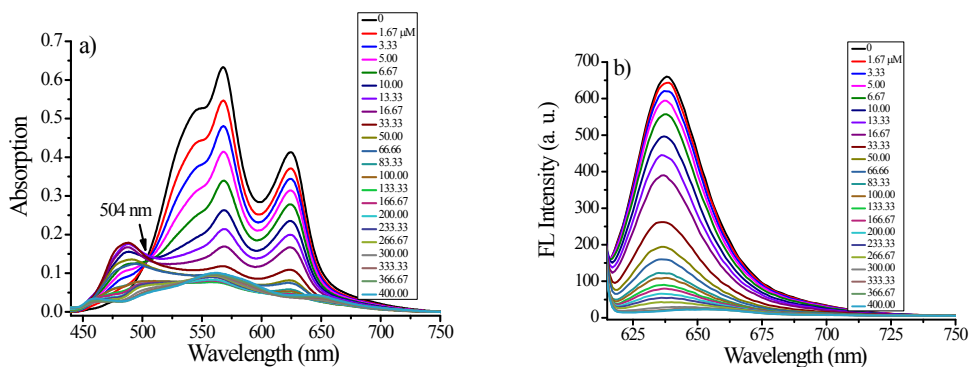

**Fig. S3** UV-Vis (a) and fluorescence (b) spectra of probe SQ (5 μM) upon addition of SDP in distilled water (pH 7.0). ( $\lambda_{\text{ex}} = 600 \text{ nm}$ )

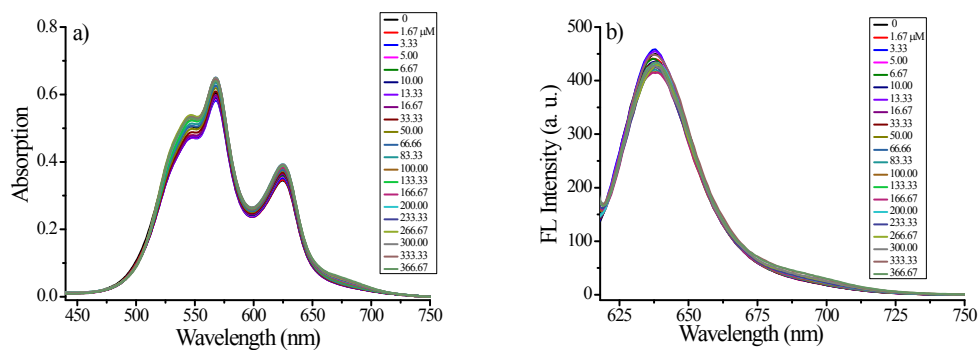

**Fig. S4** UV-Vis (a) and fluorescence (b) spectra of probe SQ (5 μM) upon addition of CTAB in distilled water (pH 7.0). ( $\lambda_{\text{ex}} = 600 \text{ nm}$ )

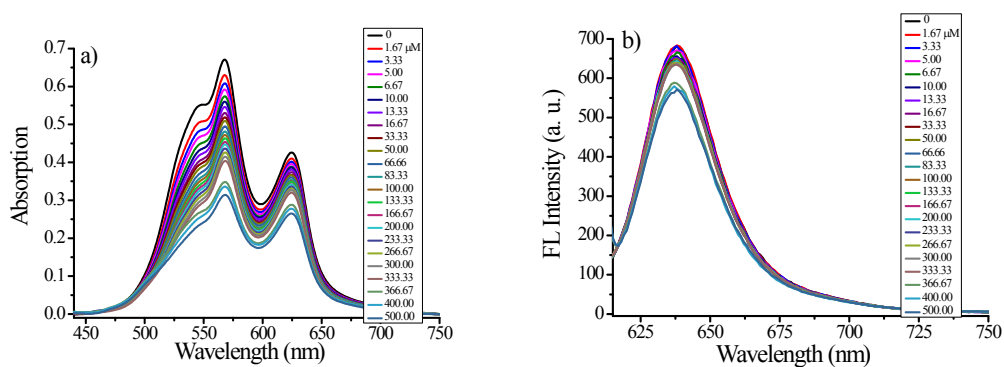

**Fig. S5** UV-Vis (a) and fluorescence (b) spectra of probe SQ (5 μM) upon addition of TritonX-100 in distilled water (pH 7.0). ( $\lambda_{\text{ex}} = 600 \text{ nm}$ )

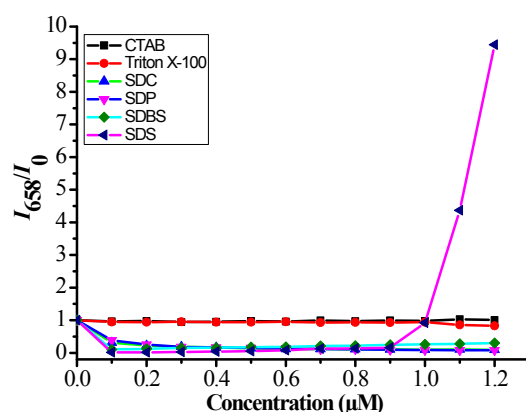

**Fig. S6** Plots of relative fluorescent intensity changes ( $I_{658}/I_0$ ) of probe **SQ** ( $5 \mu\text{M}$ ) in distilled water (pH 7.0) induced by the addition of different amounts of surfactants as indicated.  $I_0$  indicates the fluorescence intensity of free surfactants, while  $I_{658}$  indicated the fluorescence intensity upon addition of surfactants.

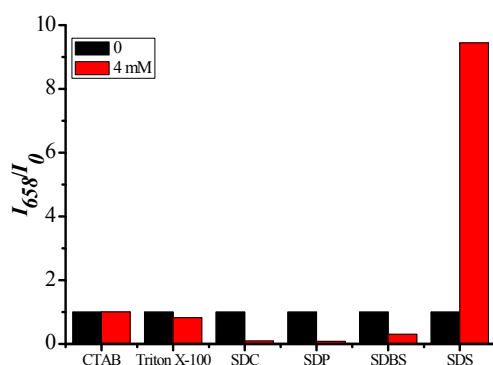

**Fig. S7** Plots of relative fluorescent intensity changes ( $I_{658}/I_0$ ) of probe **SQ** ( $5 \mu\text{M}$ ) in distilled water (pH 7.0) induced by the addition of different amounts of surfactants as indicated. Black bars indicate the fluorescence intensity of free surfactants, while red bars indicated the fluorescence intensity upon addition of surfactants [surfactants] = 0.4 mM.

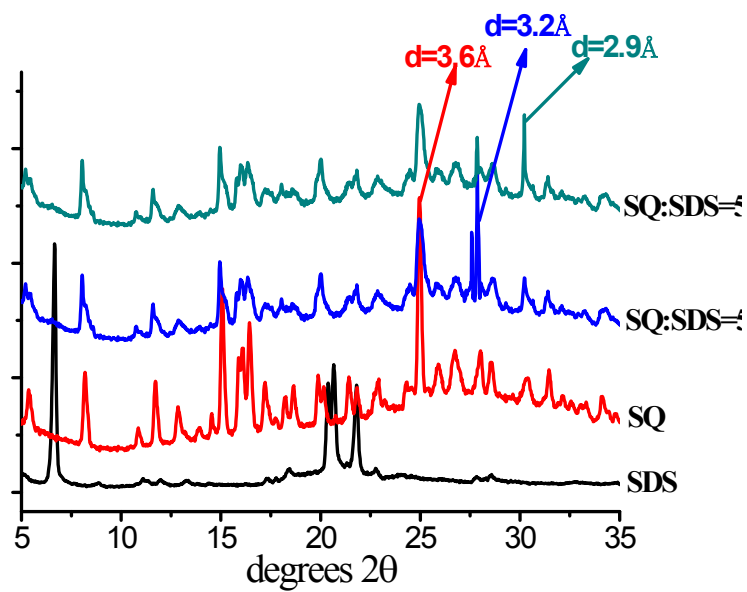

**Fig. S8** X-ray powder diffraction patterns of SQ in the absence and presence of SDS.

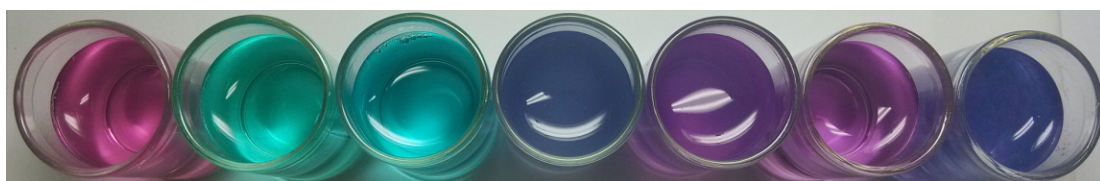

**BI          SDS          SDBS          SDP          SDC          Triton X-100          TAB**

**an**

**k**

**Fig. S9** Colorimetric responses of probe SQ (0.075  $\mu$ M) in urine induced by the addition of various surfactants (3.00  $\mu$ M) as indicated.

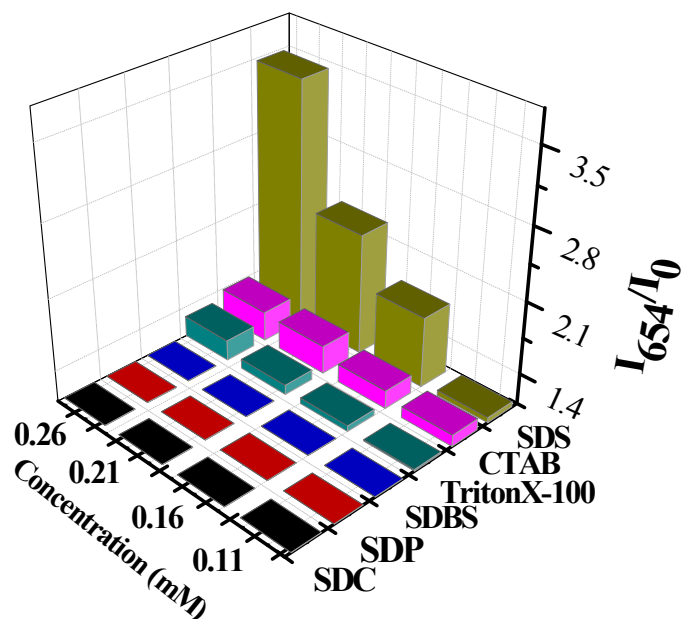

**Fig. S10** Plots of relative fluorescent intensity changes ( $I_{658}/I_0$ ) of probe SQ ( $5 \mu\text{M}$ ) in urine induced by the addition of different amounts of surfactants as indicated.  $I_0$  indicates the fluorescence intensity of free surfactants, while  $I_{658}$  indicated the fluorescence intensity upon addition of surfactants.

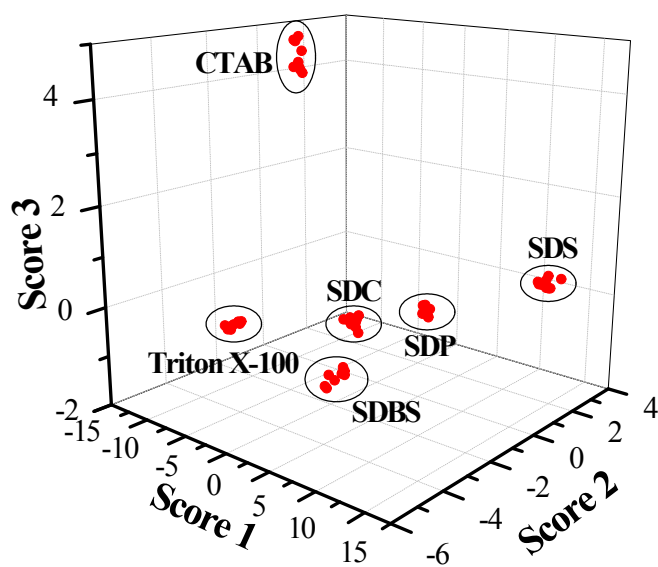

**Fig. S11** Three-dimensional LDA score plot of probe SQ ( $5 \mu\text{M}$ ) in urine induced by the addition of surfactants ( $3.00 \mu\text{M}$ ) as indicated.



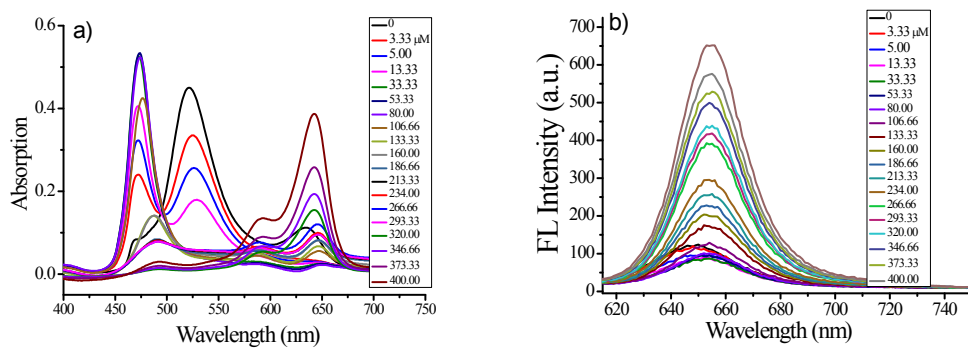

Fig.S12 UV-Vis (a) and fluorescence (b) spectra of probe **SQ** (5 μM) upon addition of SDS in urine. ( $\lambda_{\text{ex}} = 600 \text{ nm}$ )

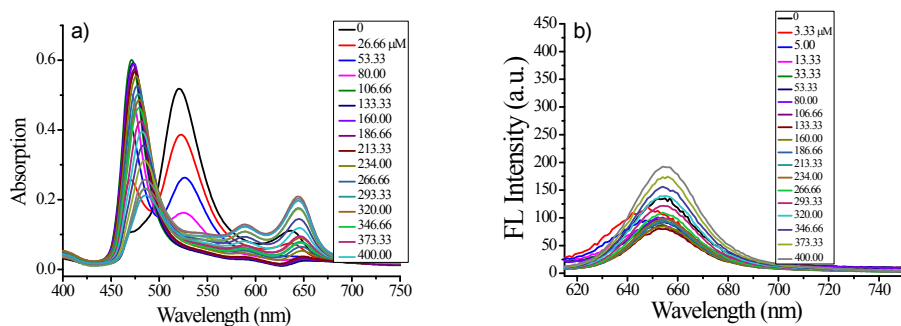

Fig.S13 UV-Vis (a) and fluorescence (b) spectra of probe **SQ** (5 μM) upon addition of SDBS in urine. ( $\lambda_{\text{ex}} = 600 \text{ nm}$ )

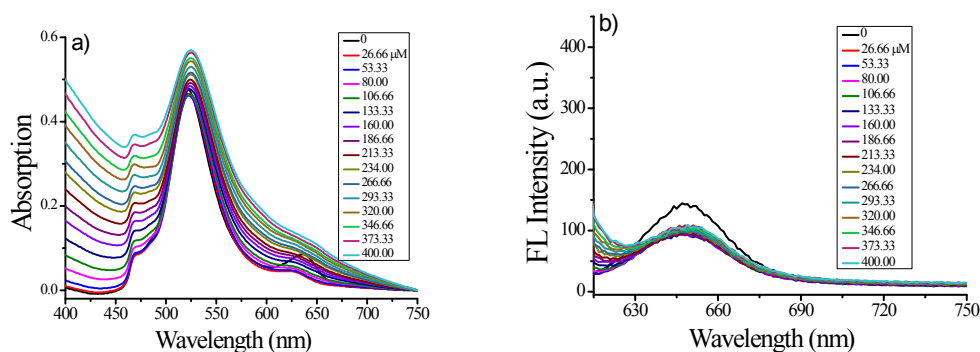

Fig.S14 UV-Vis (a) and fluorescence (b) spectra of probe **SQ** (5 μM) upon addition of SDC in urine. ( $\lambda_{\text{ex}} = 600 \text{ nm}$ )

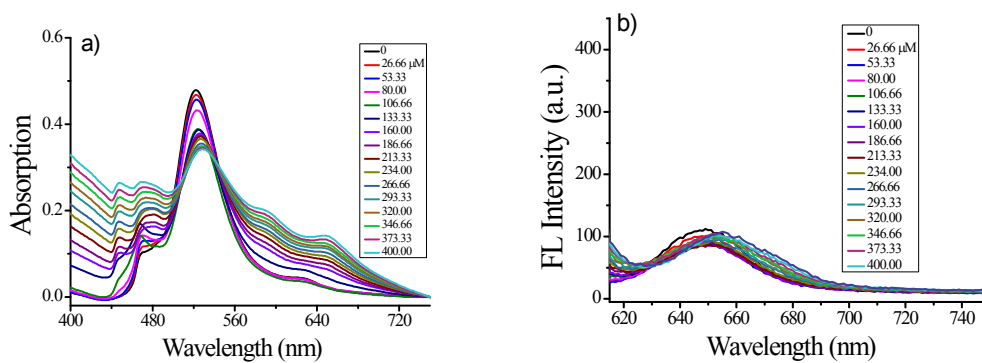

Fig.S15 UV-Vis (a) and fluorescence (b) spectra of probe **SQ** (5 μM) upon addition of SDP in urine. ( $\lambda_{\text{ex}} = 600 \text{ nm}$ )

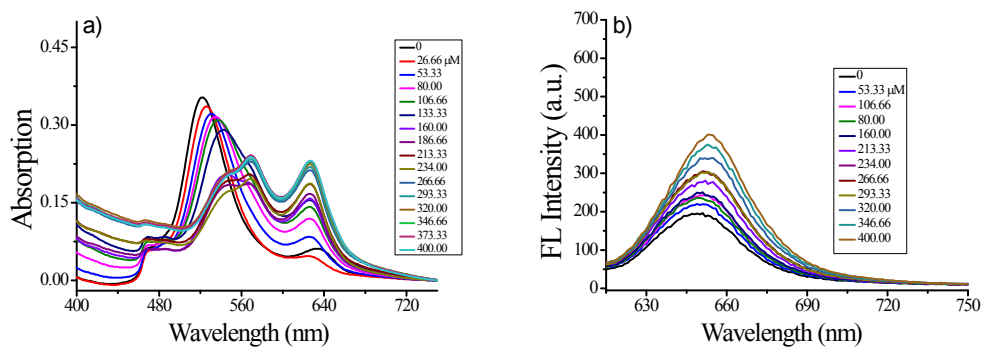

Fig.S16 UV-Vis (a) and fluorescence (b) spectra of probe **SQ** (5 μM) upon addition of CTAB in urine. ( $\lambda_{\text{ex}} = 600 \text{ nm}$ )

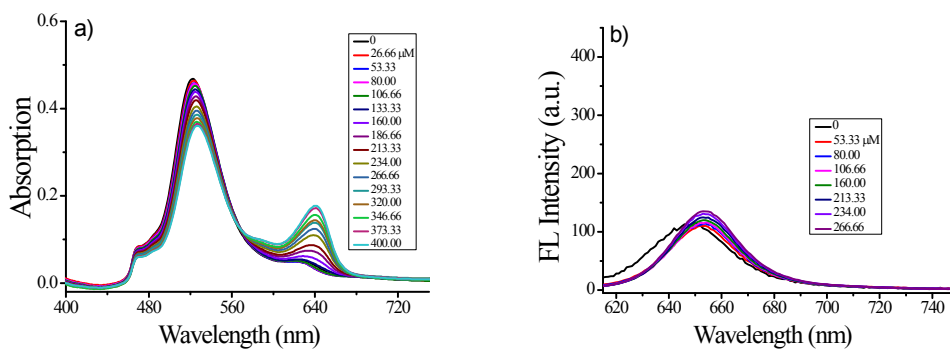

Fig.S17 UV-Vis (a) and fluorescence (b) spectra of probe **SQ** (5 μM) upon addition of TritonX-100 in urine. ( $\lambda_{\text{ex}} = 600 \text{ nm}$ )

S1. Xu, Y.; Li, Z.; Malkovskiy, A.; Sun, S.; Pang, Y. *J. Phys. Chem. B* **2010**, *114*, 8574.
